# Supplementary material for: The Association Between Emotional and Behavioral Problems in Children with Autism Spectrum Disorder and Psychological Distress in Their Parents: A Systematic Review and Meta-analysis
Source: Springer Nature journal article supplement (doi:10.1007/s10803-018-3605-y), 2018-05-18
Supplement: MOESM1 [file 15776088]

Supplemental Material for: The association between emotional and behavioural problems in children with ASD and stress and mental health problems in their parents: a systematic review and meta-analysis.

Journal of Autism and Developmental Disorders

Isabel Yorke<sup>1</sup>, Pippa White<sup>1</sup>, Amelia Weston<sup>2</sup>, Monica Rafla<sup>1</sup>, Tony Charman<sup>1</sup>, Emily Simonoff<sup>1</sup>

<sup>1</sup>King's College London, Institute of Psychiatry, Psychology & Neuroscience, London, UK

<sup>2</sup>University of Bath, Department of Psychology, Bath, UK

Correspondence: Isabel Yorke, Institute of Psychiatry, Psychology & Neuroscience, 16 De Crespigny Park, London, SE5 8AF; 0207 848 5832; [isabel.yorke@kcl.ac.uk](mailto:isabel.yorke@kcl.ac.uk).

[orcid.org/0000-0001-8603-0910](https://orcid.org/0000-0001-8603-0910)

Supplemental Material 1. Exact search strategies run in each database

## OID Medline

1. exp Child Development Disorders, Pervasive/
2. autism\*.mp. [mp=title, abstract, original title, name of substance word, subject heading word, keyword heading word, protocol supplementary concept word, rare disease supplementary concept word, unique identifier, synonyms]
3. asperger\*.mp. [mp=title, abstract, original title, name of substance word, subject heading word, keyword heading word, protocol supplementary concept word, rare disease supplementary concept word, unique identifier, synonyms]
4. (ASD not ("atrial septal defect" or "acute stress disorder")).mp. [mp=title, abstract, original title, name of substance word, subject heading word, keyword heading word, protocol supplementary concept word, rare disease supplementary concept word, unique identifier, synonyms]
5. pervasive developmental disorder.mp. [mp=title, abstract, original title, name of substance word, subject heading word, keyword heading word, protocol supplementary concept word, rare disease supplementary concept word, unique identifier, synonyms]

6. exp anxiety disorders/ or exp "disruptive, impulse control, and conduct disorders"/ or exp mood disorders/ or exp anxiety, separation/ or exp "attention deficit and disruptive behavior disorders"/ or exp child behavior disorders/
7. maladaptive.mp. [mp=title, abstract, original title, name of substance word, subject heading word, keyword heading word, protocol supplementary concept word, rare disease supplementary concept word, unique identifier, synonyms]
8. challenging behavio\*.mp. [mp=title, abstract, original title, name of substance word, subject heading word, keyword heading word, protocol supplementary concept word, rare disease supplementary concept word, unique identifier, synonyms]
9. self-injur\*.mp. [mp=title, abstract, original title, name of substance word, subject heading word, keyword heading word, protocol supplementary concept word, rare disease supplementary concept word, unique identifier, synonyms]
10. self-harm.mp. [mp=title, abstract, original title, name of substance word, subject heading word, keyword heading word, protocol supplementary concept word, rare disease supplementary concept word, unique identifier, synonyms]
11. mood.mp. [mp=title, abstract, original title, name of substance word, subject heading word, keyword heading word, protocol supplementary concept word, rare disease supplementary concept word, unique identifier, synonyms]
12. (aggress\* not cancer).mp. [mp=title, abstract, original title, name of substance word, subject heading word, keyword heading word, protocol supplementary concept word, rare disease supplementary concept word, unique identifier, synonyms]
13. conduct disorder.mp. [mp=title, abstract, original title, name of substance word, subject heading word, keyword heading word, protocol supplementary concept word, rare disease supplementary concept word, unique identifier, synonyms]
14. conduct problem\*.mp. [mp=title, abstract, original title, name of substance word, subject heading word, keyword heading word, protocol supplementary concept word, rare disease supplementary concept word, unique identifier, synonyms]
15. ansi\*.mp. [mp=title, abstract, original title, name of substance word, subject heading word, keyword heading word, protocol supplementary concept word, rare disease supplementary concept word, unique identifier, synonyms]
16. depress\*.mp. [mp=title, abstract, original title, name of substance word, subject heading word, keyword heading word, protocol supplementary concept word, rare disease supplementary concept word, unique identifier, synonyms]
17. ADHD.mp. [mp=title, abstract, original title, name of substance word, subject heading word, keyword heading word, protocol supplementary concept word, rare disease supplementary concept word, unique identifier, synonyms]
18. attention-deficit.mp. [mp=title, abstract, original title, name of substance word, subject heading word, keyword heading word, protocol supplementary concept word, rare disease supplementary concept word, unique identifier, synonyms]
19. oppositional defiant.mp. [mp=title, abstract, original title, name of substance word, subject heading word, keyword heading word, protocol supplementary concept word, rare disease supplementary concept word, unique identifier, synonyms]

20. (internalising or internalizing).mp. [mp=title, abstract, original title, name of substance word, subject heading word, keyword heading word, protocol supplementary concept word, rare disease supplementary concept word, unique identifier, synonyms]
21. (externalising or externalizing).mp. [mp=title, abstract, original title, name of substance word, subject heading word, keyword heading word, protocol supplementary concept word, rare disease supplementary concept word, unique identifier, synonyms]
22. problem\* behavio\*.mp. [mp=title, abstract, original title, name of substance word, subject heading word, keyword heading word, protocol supplementary concept word, rare disease supplementary concept word, unique identifier, synonyms]
23. behavio\* problem\*.mp. [mp=title, abstract, original title, name of substance word, subject heading word, keyword heading word, protocol supplementary concept word, rare disease supplementary concept word, unique identifier, synonyms]
24. mental health.mp. [mp=title, abstract, original title, name of substance word, subject heading word, keyword heading word, protocol supplementary concept word, rare disease supplementary concept word, unique identifier, synonyms]
25. mental disorder\*.mp. [mp=title, abstract, original title, name of substance word, subject heading word, keyword heading word, protocol supplementary concept word, rare disease supplementary concept word, unique identifier, synonyms]
26. psychiatr\*.mp. [mp=title, abstract, original title, name of substance word, subject heading word, keyword heading word, protocol supplementary concept word, rare disease supplementary concept word, unique identifier, synonyms]
27. psychopatholog\*.mp. [mp=title, abstract, original title, name of substance word, subject heading word, keyword heading word, protocol supplementary concept word, rare disease supplementary concept word, unique identifier, synonyms]
28. comorbid\*.mp. [mp=title, abstract, original title, name of substance word, subject heading word, keyword heading word, protocol supplementary concept word, rare disease supplementary concept word, unique identifier, synonyms]
29. exp family characteristics/ or exp family relations/
30. ((stress\* or distress\* or psychopatholog\* or psychiatr\* or mental health or mental disorder\* or behavio\* or warmth or authorit\* or overcontrol or control or self-efficacy or confidence or engagement) adj2 (parent\* or mother\* or father\* or maternal or paternal or caregiver\*)).mp.
31. (son adj1 father).mp. [mp=title, abstract, original title, name of substance word, subject heading word, keyword heading word, protocol supplementary concept word, rare disease supplementary concept word, unique identifier, synonyms]
32. (daughter adj1 father).mp. [mp=title, abstract, original title, name of substance word, subject heading word, keyword heading word, protocol supplementary concept word, rare disease supplementary concept word, unique identifier, synonyms]
33. (child adj1 father).mp. [mp=title, abstract, original title, name of substance word, subject heading word, keyword heading word, protocol supplementary concept word, rare disease supplementary concept word, unique identifier, synonyms]

34. (son adj1 mother).mp. [mp=title, abstract, original title, name of substance word, subject heading word, keyword heading word, protocol supplementary concept word, rare disease supplementary concept word, unique identifier, synonyms]
35. (daughter adj1 mother).mp. [mp=title, abstract, original title, name of substance word, subject heading word, keyword heading word, protocol supplementary concept word, rare disease supplementary concept word, unique identifier, synonyms]
36. (child adj1 mother).mp. [mp=title, abstract, original title, name of substance word, subject heading word, keyword heading word, protocol supplementary concept word, rare disease supplementary concept word, unique identifier, synonyms]
37. (son adj1 parent).mp. [mp=title, abstract, original title, name of substance word, subject heading word, keyword heading word, protocol supplementary concept word, rare disease supplementary concept word, unique identifier, synonyms]
38. (daughter adj1 parent).mp. [mp=title, abstract, original title, name of substance word, subject heading word, keyword heading word, protocol supplementary concept word, rare disease supplementary concept word, unique identifier, synonyms]
39. (child adj1 parent).mp. [mp=title, abstract, original title, name of substance word, subject heading word, keyword heading word, protocol supplementary concept word, rare disease supplementary concept word, unique identifier, synonyms]
40. (son adj1 caregiver).mp. [mp=title, abstract, original title, name of substance word, subject heading word, keyword heading word, protocol supplementary concept word, rare disease supplementary concept word, unique identifier, synonyms]
41. (daughter adj1 caregiver).mp. [mp=title, abstract, original title, name of substance word, subject heading word, keyword heading word, protocol supplementary concept word, rare disease supplementary concept word, unique identifier, synonyms]
42. (child adj1 caregiver).mp. [mp=title, abstract, original title, name of substance word, subject heading word, keyword heading word, protocol supplementary concept word, rare disease supplementary concept word, unique identifier, synonyms]
43. 31 or 32 or 33 or 34 or 35 or 36 or 37 or 38 or 39 or 40 or 41 or 42
44. 1 or 2 or 3 or 4 or 5
45. 6 or 7 or 8 or 9 or 10 or 11 or 12 or 13 or 14 or 15 or 16 or 17 or 18 or 19 or 20 or 21 or 22 or 23 or 24 or 25 or 26 or 27 or 28
46. 29 or 30 or 43
47. 44 and 45 and 46
48. limit 47 to (english language and yr="2000 -Current")

## PsycARTICLES

1. autis\*.mp. [mp=title, abstract, full text, caption text]
2. asperger\*.mp. [mp=title, abstract, full text, caption text]
3. (ASD not ("atrial septal defect" or "acute stress disorder")).mp. [mp=title, abstract, full text, caption text]

4. pervasive developmental disorder.mp. [mp=title, abstract, full text, caption text]
5. maladaptive.mp. [mp=title, abstract, full text, caption text]
6. challenging behavior\*.mp. [mp=title, abstract, full text, caption text]
7. self-injury\*.mp. [mp=title, abstract, full text, caption text]
8. self-harm.mp. [mp=title, abstract, full text, caption text]
9. mood.mp. [mp=title, abstract, full text, caption text]
10. (aggress\* not cancer).mp. [mp=title, abstract, full text, caption text]
11. conduct disorder.mp. [mp=title, abstract, full text, caption text]
12. conduct problem\*.mp. [mp=title, abstract, full text, caption text]
13. anxiety\*.mp. [mp=title, abstract, full text, caption text]
14. depression\*.mp. [mp=title, abstract, full text, caption text]
15. ADHD.mp. [mp=title, abstract, full text, caption text]
16. attention-deficit.mp. [mp=title, abstract, full text, caption text]
17. oppositional defiant.mp. [mp=title, abstract, full text, caption text]
18. (internalising or internalizing).mp. [mp=title, abstract, full text, caption text]
19. (externalising or externalizing).mp. [mp=title, abstract, full text, caption text]
20. problem\* behavior\*.mp. [mp=title, abstract, full text, caption text]
21. behavior\* problem\*.mp. [mp=title, abstract, full text, caption text]
22. mental health.mp. [mp=title, abstract, full text, caption text]
23. mental disorder\*.mp. [mp=title, abstract, full text, caption text]
24. psychiatry\*.mp. [mp=title, abstract, full text, caption text]
25. psychopathology\*.mp. [mp=title, abstract, full text, caption text]
26. comorbid\*.mp. [mp=title, abstract, full text, caption text]
27. ((stress\* or distress\* or psychopathology\* or psychiatry\* or mental health or mental disorder\* or behavior\* or warmth or authority\* or overcontrol or control or self-efficacy or confidence or engagement) adj2 (parent\* or mother\* or father\* or maternal or paternal or caregiver\*)).mp.
28. (son adj1 father).mp. [mp=title, abstract, full text, caption text]
29. (daughter adj1 father).mp. [mp=title, abstract, full text, caption text]
30. (child adj1 father).mp. [mp=title, abstract, full text, caption text]
31. (son adj1 mother).mp. [mp=title, abstract, full text, caption text]
32. (daughter adj1 mother).mp. [mp=title, abstract, full text, caption text]
33. (child adj1 mother).mp. [mp=title, abstract, full text, caption text]
34. (son adj1 parent).mp. [mp=title, abstract, full text, caption text]

35. (daughter adj1 parent).mp. [mp=title, abstract, full text, caption text]
36. (child adj1 parent).mp. [mp=title, abstract, full text, caption text]
37. (son adj1 caregiver).mp. [mp=title, abstract, full text, caption text]
38. (daughter adj1 caregiver).mp. [mp=title, abstract, full text, caption text]
39. (child adj1 caregiver).mp. [mp=title, abstract, full text, caption text]
40. 28 or 29 or 30 or 31 or 32 or 33 or 34 or 35 or 36 or 37 or 38 or 39
41. 5 or 6 or 7 or 8 or 9 or 10 or 11 or 12 or 13 or 14 or 15 or 16 or 17 or 18 or 19 or 20 or 21 or 22 or 23 or 24 or 25 or 26
42. 27 or 40
43. 1 or 2 or 3 or 4
44. 41 and 42 and 43
45. limit 44 to yr="2000 -Current"

## Embase

1. exp Child Development Disorders, Pervasive/
2. autis\*.mp. [mp=title, abstract, heading word, drug trade name, original title, device manufacturer, drug manufacturer, device trade name, keyword, floating subheading]
3. asperger\*.mp. [mp=title, abstract, heading word, drug trade name, original title, device manufacturer, drug manufacturer, device trade name, keyword, floating subheading]
4. (ASD not ("atrial septal defect" or "acute stress disorder")).mp. [mp=title, abstract, heading word, drug trade name, original title, device manufacturer, drug manufacturer, device trade name, keyword, floating subheading]
5. pervasive developmental disorder.mp. [mp=title, abstract, heading word, drug trade name, original title, device manufacturer, drug manufacturer, device trade name, keyword, floating subheading]
6. exp anxiety disorders/ or exp "disruptive, impulse control, and conduct disorders"/ or exp mood disorders/ or exp anxiety, separation/ or exp "attention deficit and disruptive behavior disorders"/ or exp child behavior disorders/
7. maladaptive.mp. [mp=title, abstract, heading word, drug trade name, original title, device manufacturer, drug manufacturer, device trade name, keyword, floating subheading]
8. challenging behavio\*.mp. [mp=title, abstract, heading word, drug trade name, original title, device manufacturer, drug manufacturer, device trade name, keyword, floating subheading]
9. self-injur\*.mp. [mp=title, abstract, heading word, drug trade name, original title, device manufacturer, drug manufacturer, device trade name, keyword, floating subheading]
10. self-harm.mp. [mp=title, abstract, heading word, drug trade name, original title, device manufacturer, drug manufacturer, device trade name, keyword, floating subheading]
11. mood.mp. [mp=title, abstract, heading word, drug trade name, original title, device manufacturer, drug manufacturer, device trade name, keyword, floating subheading]

12. (aggress\* not cancer).mp. [mp=title, abstract, heading word, drug trade name, original title, device manufacturer, drug manufacturer, device trade name, keyword, floating subheading]
13. conduct disorder.mp. [mp=title, abstract, heading word, drug trade name, original title, device manufacturer, drug manufacturer, device trade name, keyword, floating subheading]
14. conduct problem\*.mp. [mp=title, abstract, heading word, drug trade name, original title, device manufacturer, drug manufacturer, device trade name, keyword, floating subheading]
15. anx\* .mp. [mp=title, abstract, heading word, drug trade name, original title, device manufacturer, drug manufacturer, device trade name, keyword, floating subheading]
16. depress\*.mp. [mp=title, abstract, heading word, drug trade name, original title, device manufacturer, drug manufacturer, device trade name, keyword, floating subheading]
17. ADHD.mp. [mp=title, abstract, heading word, drug trade name, original title, device manufacturer, drug manufacturer, device trade name, keyword, floating subheading]
18. attention-deficit.mp. [mp=title, abstract, heading word, drug trade name, original title, device manufacturer, drug manufacturer, device trade name, keyword, floating subheading]
19. oppositional defiant.mp. [mp=title, abstract, heading word, drug trade name, original title, device manufacturer, drug manufacturer, device trade name, keyword, floating subheading]
20. (internalising or internalizing).mp. [mp=title, abstract, heading word, drug trade name, original title, device manufacturer, drug manufacturer, device trade name, keyword, floating subheading]
21. (externalising or externalizing).mp. [mp=title, abstract, heading word, drug trade name, original title, device manufacturer, drug manufacturer, device trade name, keyword, floating subheading]
22. problem\* behavio\*.mp. [mp=title, abstract, heading word, drug trade name, original title, device manufacturer, drug manufacturer, device trade name, keyword, floating subheading]
23. behavio\* problem\*.mp. [mp=title, abstract, heading word, drug trade name, original title, device manufacturer, drug manufacturer, device trade name, keyword, floating subheading]
24. mental health.mp. [mp=title, abstract, heading word, drug trade name, original title, device manufacturer, drug manufacturer, device trade name, keyword, floating subheading]
25. mental disorder\*.mp. [mp=title, abstract, heading word, drug trade name, original title, device manufacturer, drug manufacturer, device trade name, keyword, floating subheading]
26. psychiatr\*.mp. [mp=title, abstract, heading word, drug trade name, original title, device manufacturer, drug manufacturer, device trade name, keyword, floating subheading]
27. psychopatholog\*.mp. [mp=title, abstract, heading word, drug trade name, original title, device manufacturer, drug manufacturer, device trade name, keyword, floating subheading]
28. comorbid\*.mp. [mp=title, abstract, heading word, drug trade name, original title, device manufacturer, drug manufacturer, device trade name, keyword, floating subheading]
29. exp family characteristics/ or exp family relations/
30. ((stress\* or distress\* or psychopatholog\* or psychiatr\* or mental health or mental disorder\* or behavio\* or warmth or authorit\* or overcontrol or control or self-efficacy or confidence or engagement) adj2 (parent\* or mother\* or father\* or maternal or paternal or caregiver\*))).mp.
31. (son adj1 father).mp. [mp=title, abstract, heading word, drug trade name, original title, device manufacturer, drug manufacturer, device trade name, keyword, floating subheading]

32. (daughter adj1 father).mp. [mp=title, abstract, heading word, drug trade name, original title, device manufacturer, drug manufacturer, device trade name, keyword, floating subheading]
33. (child adj1 father).mp. [mp=title, abstract, heading word, drug trade name, original title, device manufacturer, drug manufacturer, device trade name, keyword, floating subheading]
34. (son adj1 mother).mp. [mp=title, abstract, heading word, drug trade name, original title, device manufacturer, drug manufacturer, device trade name, keyword, floating subheading]
35. (daughter adj1 mother).mp. [mp=title, abstract, heading word, drug trade name, original title, device manufacturer, drug manufacturer, device trade name, keyword, floating subheading]
36. (child adj1 mother).mp. [mp=title, abstract, heading word, drug trade name, original title, device manufacturer, drug manufacturer, device trade name, keyword, floating subheading]
37. (son adj1 parent).mp. [mp=title, abstract, heading word, drug trade name, original title, device manufacturer, drug manufacturer, device trade name, keyword, floating subheading]
38. (daughter adj1 parent).mp. [mp=title, abstract, heading word, drug trade name, original title, device manufacturer, drug manufacturer, device trade name, keyword, floating subheading]
39. (child adj1 parent).mp. [mp=title, abstract, heading word, drug trade name, original title, device manufacturer, drug manufacturer, device trade name, keyword, floating subheading]
40. (son adj1 caregiver).mp. [mp=title, abstract, heading word, drug trade name, original title, device manufacturer, drug manufacturer, device trade name, keyword, floating subheading]
41. (daughter adj1 caregiver).mp. [mp=title, abstract, heading word, drug trade name, original title, device manufacturer, drug manufacturer, device trade name, keyword, floating subheading]
42. (child adj1 caregiver).mp. [mp=title, abstract, heading word, drug trade name, original title, device manufacturer, drug manufacturer, device trade name, keyword, floating subheading]
43. 31 or 32 or 33 or 34 or 35 or 36 or 37 or 38 or 39 or 40 or 41 or 42
44. 1 or 2 or 3 or 4 or 5
45. 6 or 7 or 8 or 9 or 10 or 11 or 12 or 13 or 14 or 15 or 16 or 17 or 18 or 19 or 20 or 21 or 22 or 23 or 24 or 25 or 26 or 27 or 28
46. 29 or 30 or 43
47. 44 and 45 and 46
48. limit 47 to (english language and yr="2000 -Current")

## PsycINFO

1. autism\*.mp. [mp=title, abstract, heading word, table of contents, key concepts, original title, tests & measures]
2. asperger\*.mp. [mp=title, abstract, heading word, table of contents, key concepts, original title, tests & measures]
3. (ASD not ("atrial septal defect" or "acute stress disorder")).mp. [mp=title, abstract, heading word, table of contents, key concepts, original title, tests & measures]



4. pervasive developmental disorder.mp. [mp=title, abstract, heading word, table of contents, key concepts, original title, tests & measures]
5. maladaptive.mp. [mp=title, abstract, heading word, table of contents, key concepts, original title, tests & measures]
6. challenging behavio\*.mp. [mp=title, abstract, heading word, table of contents, key concepts, original title, tests & measures]
7. self-injur\*.mp. [mp=title, abstract, heading word, table of contents, key concepts, original title, tests & measures]
8. self-harm.mp. [mp=title, abstract, heading word, table of contents, key concepts, original title, tests & measures]
9. mood.mp. [mp=title, abstract, heading word, table of contents, key concepts, original title, tests & measures]
10. (aggress\* not cancer).mp. [mp=title, abstract, heading word, table of contents, key concepts, original title, tests & measures]
11. conduct disorder.mp. [mp=title, abstract, heading word, table of contents, key concepts, original title, tests & measures]
12. conduct problem\*.mp. [mp=title, abstract, heading word, table of contents, key concepts, original title, tests & measures]
13. anxi\*.mp. [mp=title, abstract, heading word, table of contents, key concepts, original title, tests & measures]
14. depress\*.mp. [mp=title, abstract, heading word, table of contents, key concepts, original title, tests & measures]
15. ADHD.mp. [mp=title, abstract, heading word, table of contents, key concepts, original title, tests & measures]
16. attention-deficit.mp. [mp=title, abstract, heading word, table of contents, key concepts, original title, tests & measures]
17. oppositional defiant.mp. [mp=title, abstract, heading word, table of contents, key concepts, original title, tests & measures]
18. (internalising or internalizing).mp. [mp=title, abstract, heading word, table of contents, key concepts, original title, tests & measures]
19. (externalising or externalizing).mp. [mp=title, abstract, heading word, table of contents, key concepts, original title, tests & measures]
20. problem\* behavio\*.mp. [mp=title, abstract, heading word, table of contents, key concepts, original title, tests & measures]
21. behavio\* problem\*.mp. [mp=title, abstract, heading word, table of contents, key concepts, original title, tests & measures]
22. mental health.mp. [mp=title, abstract, heading word, table of contents, key concepts, original title, tests & measures]
23. mental disorder\*.mp. [mp=title, abstract, heading word, table of contents, key concepts, original title, tests & measures]

24. psychiatr\*.mp. [mp=title, abstract, heading word, table of contents, key concepts, original title, tests & measures]
25. psychopatholog\*.mp. [mp=title, abstract, heading word, table of contents, key concepts, original title, tests & measures]
26. comorbid\*.mp. [mp=title, abstract, heading word, table of contents, key concepts, original title, tests & measures]
27. ((stress\* or distress\* or psychopatholog\* or psychiatr\* or mental health or mental disorder\* or behavio\* or warmth or authorit\* or overcontrol or control or self-efficacy or confidence or engagement) adj2 (parent\* or mother\* or father\* or maternal or paternal or caregiver\*)).mp.
28. (son adj1 father).mp. [mp=title, abstract, heading word, table of contents, key concepts, original title, tests & measures]
29. (daughter adj1 father).mp. [mp=title, abstract, heading word, table of contents, key concepts, original title, tests & measures]
30. (child adj1 father).mp. [mp=title, abstract, heading word, table of contents, key concepts, original title, tests & measures]
31. (son adj1 mother).mp. [mp=title, abstract, heading word, table of contents, key concepts, original title, tests & measures]
32. (daughter adj1 mother).mp. [mp=title, abstract, heading word, table of contents, key concepts, original title, tests & measures]
33. (child adj1 mother).mp. [mp=title, abstract, heading word, table of contents, key concepts, original title, tests & measures]
34. (son adj1 parent).mp. [mp=title, abstract, heading word, table of contents, key concepts, original title, tests & measures]
35. (daughter adj1 parent).mp. [mp=title, abstract, heading word, table of contents, key concepts, original title, tests & measures]
36. (child adj1 parent).mp. [mp=title, abstract, heading word, table of contents, key concepts, original title, tests & measures]
37. (son adj1 caregiver).mp. [mp=title, abstract, heading word, table of contents, key concepts, original title, tests & measures]
38. (daughter adj1 caregiver).mp. [mp=title, abstract, heading word, table of contents, key concepts, original title, tests & measures]
39. (child adj1 caregiver).mp. [mp=title, abstract, heading word, table of contents, key concepts, original title, tests & measures]
40. 28 or 29 or 30 or 31 or 32 or 33 or 34 or 35 or 36 or 37 or 38 or 39
41. exp autism spectrum disorders/
42. exp anxiety disorders/ or exp impulse control disorders/ or exp attention deficit disorder/ or exp attention deficit disorder with hyperactivity/ or exp behavior disorders/ or exp conduct disorder/ or exp emotional disturbances/
43. exp parental characteristics/ or exp parenting/

44. 1 or 2 or 3 or 4 or 41

45. 5 or 6 or 7 or 8 or 9 or 10 or 11 or 12 or 13 or 14 or 15 or 16 or 17 or 18 or 19 or 20 or 21 or 22 or 23 or 24 or 25 or 26

46. 42 or 45

47. 44 and 46

48. 27 or 40 or 43

49. 47 and 48

50. limit 49 to (english language and yr="2000 -Current")

## Cochrane

#1 "pervasive developmental disorder"

#2 autis\*

#3 ASD not ("atrial septic defect" or "acute stress disorder")

#4 Asperger\*

#5 MeSH descriptor: [Child Development Disorders, Pervasive] explode all trees

#6 #1 or #2 or #3 or #4 or #5

#7 maladaptive

#8 "challenging behavio\*"

#9 self-injur\* or self-harm

#10 mood

#11 aggress\* not cancer

#12 "conduct problem\*"

#13 "conduct disorder"

#14 anxi\*

#15 depress\*

#16 ADHD

#17 attention-deficit

#18 "oppositional defiant"

#19 internalising or internalizing

#20 externalizing or externalising

#21 "problem\* behavio\*"

#22 "behavio\* problem\*"

#23 "mental health"

#24 "mental disorder\*"

- #25 psychiatr\*
- #26 psychopatholog\*
- #27 comorbid\*
- #28 MeSH descriptor: [Disruptive, Impulse Control, and Conduct Disorders] 1 tree(s) exploded
- #29 MeSH descriptor: [Anxiety Disorders] this term only
- #30 MeSH descriptor: [Mood Disorders] explode all trees
- #31 MeSH descriptor: [Anxiety, Separation] explode all trees
- #32 MeSH descriptor: [Child Behavior Disorders] explode all trees
- #33 MeSH descriptor: [Attention Deficit and Disruptive Behavior Disorders] explode all trees
- #34 {or #7-#33}
- #35 stress\*
- #36 distress\*
- #37 psychopatholog\*
- #38 psychiatr\*
- #39 "mental health"
- #40 "mental disorder"
- #41 warmth
- #42 authorit\*
- #43 overcontrol
- #44 control
- #45 self-efficacy
- #46 confidence
- #47 engagement
- #48 behavio\*
- #49 {or #35-#48}
- #50 parent\*
- #51 mother\*
- #52 father\*
- #53 paternal
- #54 maternal
- #55 caregiver
- #56 {or #50-#55}

- #57 #49 near/2 #56
- #58 son or daughter or child
- #59 mother or father or parent or caregiver
- #60 #58 near/1 #59
- #61 MeSH descriptor: [Family Relations] explode all trees
- #62 MeSH descriptor: [Family Characteristics] explode all trees
- #63 #57 or #60 or #61 or #62
- #64 #63 and #34 and #6

## Web of Science Core Collection

#31 #30 AND #29 AND #28

*DocType=All document types; Language=All languages;*

#30 #27 OR #26

*DocType=All document types; Language=All languages;*

#29 #25 OR #24 OR #23 OR #22 OR #21 OR #20 OR #19 OR #18 OR #17 OR #16 OR #15 OR #14 OR #13 OR #12 OR #11 OR #10 OR #9 OR #8 OR #7 OR #6 OR #5

*DocType=All document types; Language=All languages;*

#28 #4 OR #3 OR #2 OR #1

*DocType=All document types; Language=All languages;*

#27 **TOPIC:** ((son or daughter or child) near/1 (father or mother or parent or caregiver))

*DocType=All document types; Language=All languages;*

#26 **TS:**((parent\* OR mother\* or father\* or maternal or paternal or caregiver\*) NEAR/2 (stress\* or distress\* or psychopatholog\* or psychiatr\* or "mental health" or "mental disorder\*" or behavio\* or warmth or authorit\* or overcontrol or control or self-efficacy or confidence or engagement))

*DocType=All document types; Language=All languages;*

#25 **TOPIC:** (comorbid\*)

*DocType=All document types; Language=All languages;*

#24 **TOPIC:** (psychopatholog\*)

*DocType=All document types; Language=All languages;*

#23 **TOPIC:** (psychiatr\*)

*DocType=All document types; Language=All languages;*

#22 **TOPIC:** ("mental disorder\*")

*DocType=All document types; Language=All languages;*

#21 **TOPIC:** ("mental health")

*DocType=All document types; Language=All languages;*

#20 **TOPIC:** (problem\* near/1 behavio\*)

*DocType=All document types; Language=All languages;*

#19 **TOPIC:** (externali\*ing)

*DocType=All document types; Language=All languages;*

#18 **TOPIC:** (internali\*ing)

*DocType=All document types; Language=All languages;*

#17 **TOPIC:** ("oppositional defiant")

*DocType=All document types; Language=All languages;*

#16 **TOPIC:** (attention-deficit)

*DocType=All document types; Language=All languages;*

#15 **TOPIC:** (ADHD)

*DocType=All document types; Language=All languages;*

#14 **TOPIC:** (depress\*)

*DocType=All document types; Language=All languages;*

#13 **TOPIC:** (anxi\*)

*DocType=All document types; Language=All languages;*

#12 **TOPIC:** ("conduct problem\*")

*DocType=All document types; Language=All languages;*

#11 **TOPIC:** ("conduct disorder")  
*DocType=All document types; Language=All languages;*

#10 **TOPIC:** (aggress\* NOT cancer)  
*DocType=All document types; Language=All languages;*

#9 **TOPIC:** (mood)  
*DocType=All document types; Language=All languages;*

#8 **TOPIC:** (self-injur\*)  
*DocType=All document types; Language=All languages;*

#7 **TOPIC:** (self-harm)  
*DocType=All document types; Language=All languages;*

#6 **TOPIC:** ("challenging behavio\*")  
*DocType=All document types; Language=All languages;*

#5 **TOPIC:** (maladaptive)  
*DocType=All document types; Language=All languages;*

#4 **TOPIC:** ("pervasive developmental disorder")  
*DocType=All document types; Language=All languages;*

#3 **TS:**(ASD NOT ("atrial septal defect" or "acute distress disorder"))  
*DocType=All document types; Language=All languages;*

#2 **TOPIC:** (Asperger\*)  
*DocType=All document types; Language=All languages;*

#1 **TOPIC:** (Autis\*)  
*DocType=All document types; Language=All languages;*
